# Supplementary material for: Identification and Comparative Analysis of the Protocadherin Cluster in a Reptile, the Green Anole Lizard
Source: PubMed Central journal article supplement (PMC2764143; doi:10.1371/journal.pone.0007614), 2009-10-29
Supplement: pone.0007614.s001.pdf [file pone.0007614.s001.pdf]

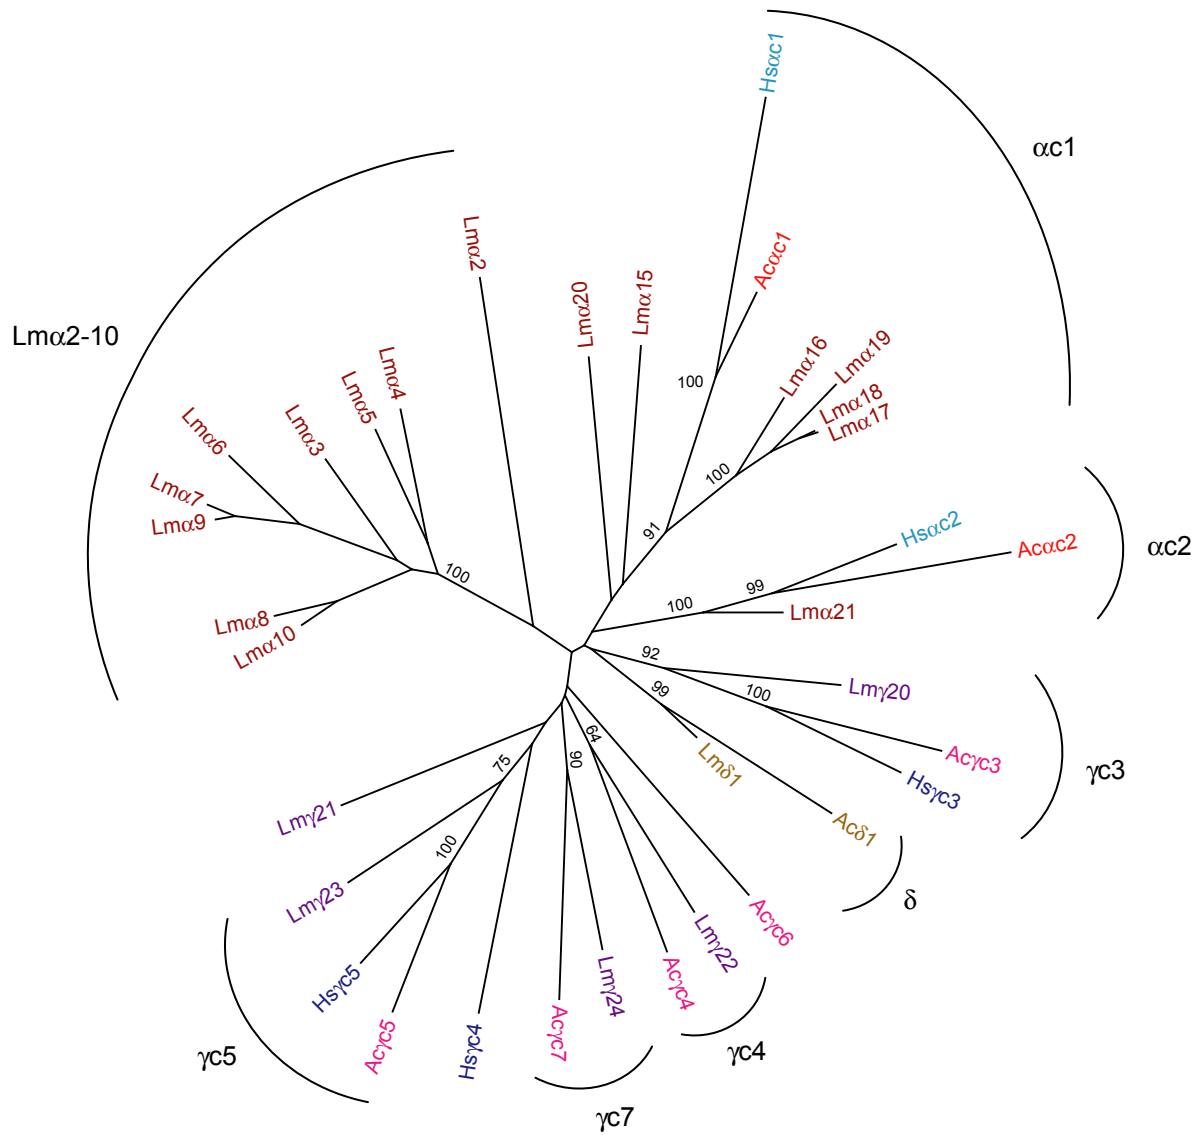

**Figure S1. Phylogenetic analysis of c-type protocadherin and the protocadherin  $\delta$  subcluster genes.**

Amino acid sequences for the EC1-EC3 ectodomain region of anole, human and coelacanth protocadherin variable exons were aligned by ClustalW. The phylogenetic tree was constructed by the maximum-likelihood method. Genes in different protocadherin subclusters are indicated by color. Numbers at the nodes are the percentage of bootstrap values of 100 replicates. The tree is unrooted.
